# Supplementary material for: An aptasensor for the label-free detection of thrombin based on turn-on fluorescent DNA-templated Cu/Ag nanoclusters
Source: Royal Society of Chemistry journal article supplement (doi:10.1039/d0ra04609d), 2020-01-01
Supplement: d0ra04609d1.pdf [file d0ra04609d1.pdf]

## Electronic Supplementary Material

### **The aptasensor for label-free detection of thrombin based on turn-on fluorescent DNA-templated Cu/Ag nanoclusters**

**Baozhu Zhang <sup>a</sup> and Chunying Wei<sup>\*b</sup>**

*<sup>a</sup> College of Chemistry and Chemical Engineering, Jinzhong University, Yuci 030619, Shanxi, China*

*<sup>b</sup> Key Laboratory of Chemical Biology and Molecular Engineering of Ministry of Education, Institute of Molecular Science, Shanxi University, Taiyuan 030006, Shanxi, China*

---

<sup>\*</sup>Corresponding author.

*E-mail address:* weichuny@sxu.edu.cn (C. Wei)

**Table S1** Names and sequences of the oligonucleotides.

| Oligonucleotids | Sequences (5'-3')                                              |
|-----------------|----------------------------------------------------------------|
| TBA1            | CCCTTAATCCCC <u>TTTTTGGTTGGTGTGGTTGGTTTTT</u> CCCTAACTCCC<br>C |
| TBA2            | GGTTGGTGTGGTTGGTT <u>TTTTT</u> CCCTAACTCCCC                    |

**Table S2** Comparison of different strategies for the detection of thrombin.

| Detection methods          | LOD     | Linear range  | References |
|----------------------------|---------|---------------|------------|
| Surface plasmon resonance  | 0.10 nM | 0.10-75 nM    | 34         |
| Fluorescence               | 0.18 nM | 0.50-20 nM    | 35         |
| Fluorescence DNA-Ag NCs    | 1.0 nM  | 0.0-50 nM     | 36         |
| UV-vis absorbance          | 3.0 nM  | 5.0-30.4 nM   | 37         |
| Fluorescence               | 30 pM   | 0.28-86 nM    | 9          |
| Fluorescence               | 31.3 pM | 62.5-187.5 PM | 10         |
| Fluorescence DNA-Cu/Ag NCs | 1.6 nM  | 1.6-8.0 nM    | this work  |

**Table S3** The lifetimes of TBA1-Cu/Ag NCs in the absence and presence of different concentration of thrombin.

| Samples             | [TB] (nM) | $\tau_1$ (ns) | $\tau_2$ (ns) | $\tau_3$ (ns) | $\tau_{avg}$ (ns) | $\chi^2$ |
|---------------------|-----------|---------------|---------------|---------------|-------------------|----------|
| TBA1-Cu/Ag NCs      | 0         | 0.43 (50%)    | 2.8(27%)      | 13 (23%)      | 3.9               | 1.090    |
| TBA1-Cu/Ag NCs + TB | 3.2       | 0.39 (46%)    | 2.6 (26%)     | 12 (28%)      | 4.1               | 1.093    |
|                     | 6.4       | 0.37 (44%)    | 2.5 (27%)     | 10 (29%)      | 3.8               | 1.100    |
|                     | 8.0       | 0.36 (53%)    | 2.5 (25%)     | 11 (22%)      | 3.3               | 1.096    |

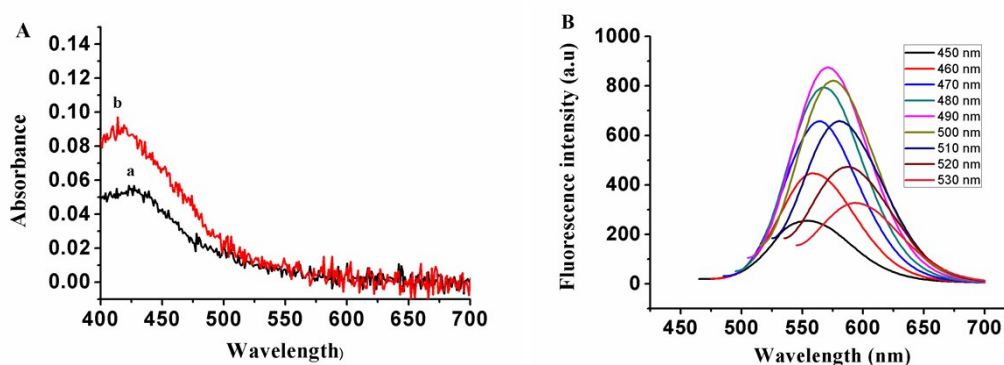

**Fig. S1** (A) UV-vis spectra of TBA2-Ag NCs without (a) and with 10 U/L thrombin (b). (B) Fluorescence emission spectra of TBA2-Cu/Ag NCs under different excitation wavelength.  $c(\text{DNA}) = 3 \mu\text{M}$ , Tris-HAc (10 mM, pH 7.0)

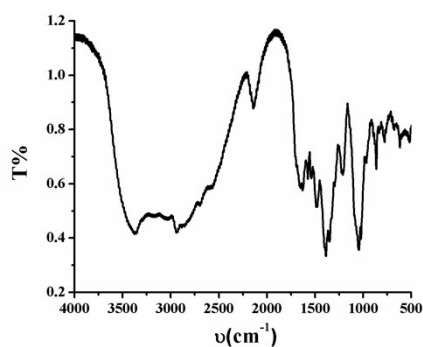

**Fig. S2** The IR spectrum of TBA1-Cu/Ag NCs.

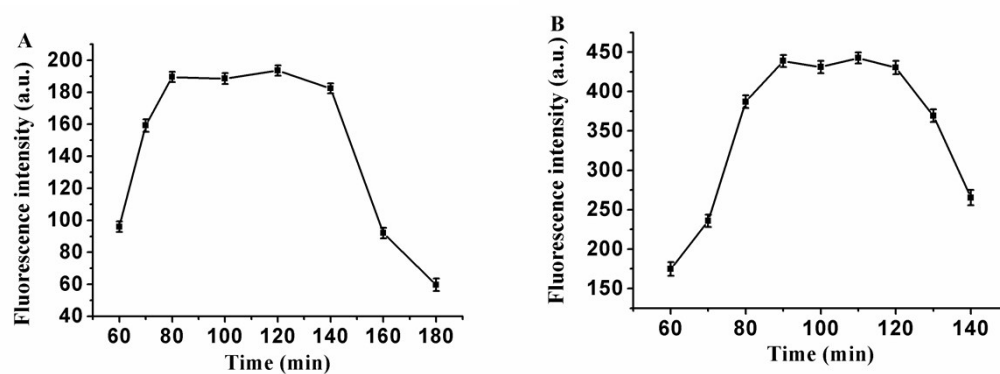

**Fig. S3** Stability of Cu/Ag NCs. The changes of fluorescence intensities of TBA1-Cu/Ag NCs at 560 nm (A) and TBA2-Cu/Ag NCs at 575 nm (B) against the increasing time. The error bars represent the standard deviation of three independent measurements.  $c$  (DNA) = 1.5  $\mu$ M.

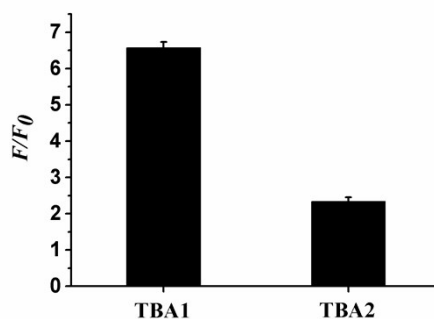

**Fig. S4** Relative fluorescence intensity ( $F/F_0$ ) of different DNA-Cu/Ag NCs.  $F_0$  and  $F$  are the maximum emission intensity of the DNA-Cu/Ag NCs before and after the addition of 8.0 nM thrombin, respectively. The error bars

represent the standard deviation of three independent measurements.

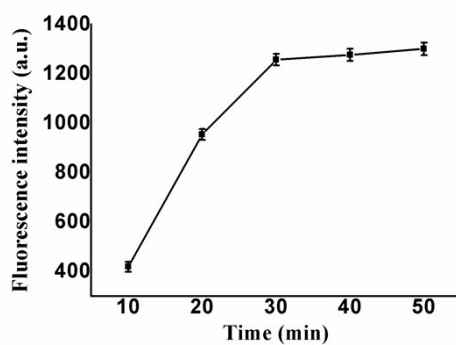

**Fig. S5** Fluorescence intensity of TBA1-Cu/Ag NCs in the presence of 8.0 nM thrombin against the increasing reaction time. The error bars represent the standard deviation of three independent measurements.  $c(\text{DNA}) = 1.5 \mu\text{M}$ .

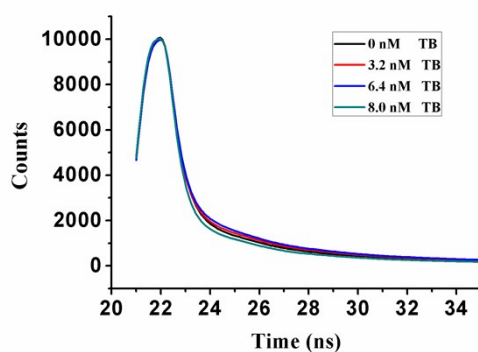

**Fig. S6** The fluorescence lifetime curves of TBA1-Cu/Ag NCs (excitation at 405 nm and emission at 560 nm) incubating with the different concentration of Thrombin.
